# Supplementary material for: The Genetic Basis of Childhood Obesity: A Systematic Review
Source: MDPI journal article supplement (doi:10.3390/nu15061416), 2023-03-15
Supplement: s1 [file s1]

# The Genetic Basis of Childhood Obesity: A Systematic Review

Supplementary Material Table S1: Lifestyle intervention characteristics

| References                                         | Type of Intervention                                                                                                                                                                                                                                        | Duration | Dietary Intervention                                                                                                     | Exercise                                                                                                                                                   | Psychological Counseling                                                                                                            | Compliance       |                                     | Drop out |
|----------------------------------------------------|-------------------------------------------------------------------------------------------------------------------------------------------------------------------------------------------------------------------------------------------------------------|----------|--------------------------------------------------------------------------------------------------------------------------|------------------------------------------------------------------------------------------------------------------------------------------------------------|-------------------------------------------------------------------------------------------------------------------------------------|------------------|-------------------------------------|----------|
|                                                    |                                                                                                                                                                                                                                                             |          |                                                                                                                          |                                                                                                                                                            |                                                                                                                                     | Patient Reported | Other measures of evaluation        |          |
| Barbian <i>et al</i> , J Pediatr Genet, 2020 [48]  | <p>Interdisciplinary intervention program at a campus</p> <ul style="list-style-type: none"> <li>Intervention group: physical exercises, nutritional, and psychological counseling</li> <li>Control group: not received any kind of intervention</li> </ul> | 6 months | Food education<br>1-hour, once-week                                                                                      | <p>3 times per week</p> <p>Warm up, walking, stretching, sports, aquatic activities, resisted and aerobic exercises, circuit and respiratory exercises</p> | <p>Once a week, 1 hour</p> <p>Group intervention (cognitive orientation/techniques in the handling of obesity-related thoughts)</p> | N/A              | Participation > 70% in all sessions | None     |
| Corgosinho <i>et al</i> , Neuropeptides, 2017 [49] | Multicomponent weight loss therapy (clinical, nutritional, and psychological counselling and exercise training)                                                                                                                                             | 1 year   | <p>Individual and parents' nutritional consultation</p> <p>1 hour, once-week</p> <p>Energy intake: set at the levels</p> | <p>3 times-week</p> <p>30 min of aerobic training + 30 min of resistance training</p>                                                                      | <p>Group sessions</p> <p>Psychodynamic approach</p> <p>1/week</p>                                                                   | N/A              | N/A                                 | None     |

|                                                                       |                                                                                                                        |                                           |                                                                                                                                                                        |                                                                                                                             |                                                                                                                |     |     |              |
|-----------------------------------------------------------------------|------------------------------------------------------------------------------------------------------------------------|-------------------------------------------|------------------------------------------------------------------------------------------------------------------------------------------------------------------------|-----------------------------------------------------------------------------------------------------------------------------|----------------------------------------------------------------------------------------------------------------|-----|-----|--------------|
|                                                                       |                                                                                                                        |                                           | recommended by the dietary reference intake for subjects with low levels of physical activity of the same age and sex, following a balanced diet                       |                                                                                                                             |                                                                                                                |     |     |              |
| Deram <i>et al</i> , J Clin Endocrinol Metab, 2008 [50]               | Lifestyle and Nutritional Reeducation<br><br>(Nutritionists, physical therapists, psychologists, and endocrinologists) | 20 weeks                                  | Personalized nutritional orientation<br><br>Monthly<br><br>Average of 1800 kcal/d/no restrictive but balanced diet education program                                   | Group meeting with a physical educator<br><br>Monthly                                                                       | Eating behavior group meeting with a psychologist<br><br>Monthly<br><br>Psychiatrist evaluation when necessary | N/A | N/A | 22.4%        |
| do Nascimento <i>et al</i> , European Journal of Nutrition, 2017 [51] | Children/adolescents: physical exercise intervention<br><br>Obese women: hypocaloric dietary intervention              | Children : 12 weeks<br><br>Women: 7 weeks | Women:<br><br>Hypocaloric diet: a deficit of 600 kcal/per<br><br>Energy consumption (fats: 20-35%, carbohydrates: 45-65%, proteins: 10-35%)<br><br>Dietary reeducation | Children: aerobic exercise, high-intensity interval training, combined training, water walking<br><br>Conducted by physical | N/A                                                                                                            | N/A | N/A | Women: 36.6% |

|                                                 |                                                                                                                       |          |                                                                                                                                                                                                      |                                                                                                                                                    |                                                                |     |                                                                                                                  |      |
|-------------------------------------------------|-----------------------------------------------------------------------------------------------------------------------|----------|------------------------------------------------------------------------------------------------------------------------------------------------------------------------------------------------------|----------------------------------------------------------------------------------------------------------------------------------------------------|----------------------------------------------------------------|-----|------------------------------------------------------------------------------------------------------------------|------|
|                                                 |                                                                                                                       |          |                                                                                                                                                                                                      | education professionals<br>3 times/week in home schools                                                                                            |                                                                |     |                                                                                                                  |      |
| Gajewska <i>et al</i> ,<br>Nutrients, 2016 [52] | Outpatient Multidisciplinary Intervention Program                                                                     | 3 months | A low-energy diet for children and their parents<br><br>Recommended daily energy intake: 1200–1400 kcal/day<br><br>Diet composed: 20% protein, 30% fat, 50% carbohydrates<br><br>3–5 meals every day | Physical activity instructions<br><br>Reduction of sedentary activities (< 2 hours/day)                                                            | Individual psychological care for the child and his/her family | N/A | Daily energy intake and percentage of dietary reference intake: similar in children with and without weight loss | 24%  |
| Gao <i>et al</i> , Exp Physiol, 2015 [53]       | Exercise intervention in weight-reducing summer camp (Exercise training with medical supervision and dietary control) | 4 weeks  | Daily energy intake per person (in kilocalories per day) = ideal weight × energy intake during light physical activity (25 kcal kg <sup>-1</sup> )<br><br>Energy supply: Sugar 60-70%, fat 10-       | 7 days per week, twice a day, for 120 min each session<br><br>Cycling, jogging, step-aerobics and brisk walking, including strength training three | N/A                                                            | N/A | N/A                                                                                                              | None |

|                                                         |                                                                                                                                                                                                          |                                                                 |                                                                                                                                                                                |                                                                                                     |                                                                                                                                                                                                      |     |                                                                                                                                                                  |     |
|---------------------------------------------------------|----------------------------------------------------------------------------------------------------------------------------------------------------------------------------------------------------------|-----------------------------------------------------------------|--------------------------------------------------------------------------------------------------------------------------------------------------------------------------------|-----------------------------------------------------------------------------------------------------|------------------------------------------------------------------------------------------------------------------------------------------------------------------------------------------------------|-----|------------------------------------------------------------------------------------------------------------------------------------------------------------------|-----|
|                                                         |                                                                                                                                                                                                          |                                                                 | 15%, Protein<br>20-25%                                                                                                                                                         | times per<br>week                                                                                   |                                                                                                                                                                                                      |     |                                                                                                                                                                  |     |
|                                                         |                                                                                                                                                                                                          |                                                                 | Energy supply<br>proportions:<br>Breakfast 30%,<br>Lunch: 40%,<br>Supper 30%                                                                                                   | Heart rate<br>monitor<br>(heart rate<br>+20-40%<br>heart rate<br>reserve)                           |                                                                                                                                                                                                      |     |                                                                                                                                                                  |     |
| Hagman <i>et al</i> ,<br>Pediatr Diabetes,<br>2018 [54] | Clinic based<br>behavioral<br>modification<br>therapy aimed at<br>child and parents<br><br>(Diet, exercise and<br>psychological, social<br>worker counseling<br>and medical<br>evaluation<br>biannually) | 35.9<br>±20.8<br>months<br><br>(12<br>months<br>to 10<br>years) | General diet<br>counselling by<br>a dietician<br><br>Biannually                                                                                                                | Exercise<br>counseling by<br>sports<br>therapist<br><br>Biannually                                  | Brief psychosocial<br>counseling<br><br>Biannually                                                                                                                                                   | N/A | Poor<br>response to<br>the<br>intervention:<br><br>≥0.14 BMI Z-<br>score units<br>change<br><br>Positive<br>response:<br><br>≤ -0.22 Z-<br>score units<br>change | N/A |
| Heitkamp <i>et al</i> ,<br>JAMA Pediatr,<br>2020 [55]   | In-Hospital Lifestyle<br>Intervention<br>Program                                                                                                                                                         | 4 to 6<br>weeks                                                 | Calorie-<br>restricted diet<br>(30% fat, 15%<br>proteins and<br>55%<br>carbohydrates<br>of the total<br>energy<br>content)<br><br>Energy intake:<br>1,250 - 1,800<br>kcal/day, | 10 h/week:<br>organised<br>physical<br>activity<br><br>6<br>hours/week:<br>recreational<br>exercise | Theoretical and<br>practical lessons on<br>healthy eating,<br>physical activity and<br>behavior change<br>skills based on the<br>cognitive-behavioral<br>theory<br><br>16 sessions within 4<br>weeks | N/A | N/A                                                                                                                                                              | N/A |

|                                                                       |                                                                                                                                                                                                         |                                                        |                                                                                                                  |                                                              |                                                                                                                  |     |                                                                               |                                     |
|-----------------------------------------------------------------------|---------------------------------------------------------------------------------------------------------------------------------------------------------------------------------------------------------|--------------------------------------------------------|------------------------------------------------------------------------------------------------------------------|--------------------------------------------------------------|------------------------------------------------------------------------------------------------------------------|-----|-------------------------------------------------------------------------------|-------------------------------------|
|                                                                       |                                                                                                                                                                                                         |                                                        | depending on height and sex                                                                                      |                                                              |                                                                                                                  |     |                                                                               |                                     |
| Hollensted <i>et al</i> , Obesity, 2018 [56]                          | Family-centered – Multidisciplinary Behavioral Lifestyle Intervention<br><br>(Evaluation and counselling by a team of pediatricians, pediatric nurses, dietitians, psychologists and/or social workers) | 6 to 24 months<br><br>Median 1.25 (1.00 to 1.59) years | Dietician counselling:<br><br>one hour initially, 30 min thereafter at individual intervals                      | Physical activity recommended changes                        | Psychologist and/or a social worker support                                                                      | N/A | Participation at appointments<br><br>BMI-SDS decrease                         | N/A                                 |
| Holzapfel <i>et al</i> , European Journal of Endocrinology, 2011 [57] | In Patient Lifestyle Intervention Program/<br><br>“Long-term effects of a lifestyle intervention in obesity and genetic influence in children” - (LOGIC) study                                          | 4-6 weeks                                              | Moderate energy reduction: -500 kcal/day                                                                         | Physical activities such as swimming and walking (11 h/week) | Behavior therapy                                                                                                 | N/A | N/A                                                                           | 4 weeks: 4.1%<br><br>6 weeks: 39.6% |
| Knoll <i>et al</i> , Horm Metab Res 2012 [58]                         | An Outpatient Lifestyle Intervention Program/<br><br>“Obeldicks (Exercise, dietary, behavioral intervention, and medical evaluation)                                                                    | 1 year                                                 | ‘Optimised Mixed Diet’<br><br>Fat and Sugar Reduction<br><br>30% Fat, 15% Proteins, 55% Carbohydrates , 5% Sugar | Exercise sessions: Once/week                                 | Behavior therapy: contingency contracting, self-monitoring, praise, stimulus control techniques, problem-solving | N/A | Participation on therapy trials and exercise groups, Changes in weight status | None                                |

|                                                 |                                                                                                                                            |          |                                                                                                              |                                                                                                                                                                          |                                                   |     |                                              |      |
|-------------------------------------------------|--------------------------------------------------------------------------------------------------------------------------------------------|----------|--------------------------------------------------------------------------------------------------------------|--------------------------------------------------------------------------------------------------------------------------------------------------------------------------|---------------------------------------------------|-----|----------------------------------------------|------|
| Lai <i>et al</i> , Int. J. Biol. Sci, 2013 [59] | Aerobic exercise training program<br>(Exercise intervention with dietary adaptation and medical evaluation)                                | 4 weeks  | A two-day unified dietary adaptation                                                                         | Customized aerobic training<br><br>120-min training sessions, 5 days/week<br>(warm-up, aerobic exercise at an intensity of 20-40% of heart rate reserve and a cool down) | N/A                                               | N/A | N/A                                          | None |
| Leite <i>et al</i> , Mortiz, 2017 [60]          | Aerobic and resistance training program<br>(multidisciplinary team assessment)                                                             | 12 weeks | N/A                                                                                                          | Resistance and aerobic training<br><br>Three times/week                                                                                                                  | N/A                                               | N/A | Participation > 70% of the training sessions | N/A  |
| Moleres <i>et al</i> , J Pediatr., 2012 [61]    | A Multidisciplinary Lifestyle Intervention/<br>The EVASYON Study<br>(nutritionists, physical therapists, psychologists, and pediatricians) | 3 months | Nutritional advice<br><br>Weekly group session<br><br>Total energy: 30% fat, 15% proteins, 55% carbohydrates | Physical activity program<br><br>Weekly group sessions<br><br>Calculated baseline metabolism and computed an                                                             | Psychological support<br><br>Weekly group session | N/A | N/A                                          | N/A  |

|                                                                |                                                                                                                                      |          |                                                                                                      |                                                                                                                                                                                                        |                                               |     |     |     |
|----------------------------------------------------------------|--------------------------------------------------------------------------------------------------------------------------------------|----------|------------------------------------------------------------------------------------------------------|--------------------------------------------------------------------------------------------------------------------------------------------------------------------------------------------------------|-----------------------------------------------|-----|-----|-----|
|                                                                |                                                                                                                                      |          |                                                                                                      | activity metabolic equivalent index (metabolic equivalent tasks-h/week), which represents the physical exercise during the week for each participant.                                                  |                                               |     |     |     |
| Moleres <i>et al</i> ,<br>Nutricion Hospitalaria,<br>2014 [62] | A Multidisciplinary Lifestyle Intervention/<br>The EVASYON Study<br>(nutritionists, physiotherapists, psychologists, paediatricians) | 10 weeks | Nutritional advice<br>Weekly group session<br>Total energy: 30% fat, 15% proteins, 55% carbohydrates | Physical activity program<br>Weekly group sessions<br><br>Calculated baseline metabolism and computed an activity metabolic equivalent index (metabolic equivalent tasks-h/week), which represents the | Psychological support<br>Weekly group session | N/A | N/A | N/A |

|                                                      |                                                                                                                                                            |          |                                                                                                                                                                                                   |                                                                                                        |                                                                                                       |                                                     |                                  |      |
|------------------------------------------------------|------------------------------------------------------------------------------------------------------------------------------------------------------------|----------|---------------------------------------------------------------------------------------------------------------------------------------------------------------------------------------------------|--------------------------------------------------------------------------------------------------------|-------------------------------------------------------------------------------------------------------|-----------------------------------------------------|----------------------------------|------|
|                                                      |                                                                                                                                                            |          |                                                                                                                                                                                                   | physical exercise during the week for each participant.                                                |                                                                                                       |                                                     |                                  |      |
| Moraes <i>et al</i> , An Acad Bras Cienc, 2016 [63]  | Multidisciplinary Lifestyle Intervention<br>(physical education professional, physiotherapist, pharmacist, nutritionist, psychologist, doctor and dentist) | 4 months | Nutrition counseling (15 minutes)<br><br>(educational lectures, theater productions, folders, healthy cooking classes, movie sessions, educational games and the deployment of a fruitful garden) | Warmup (10 minutes), aerobic exercises (50 minutes), exercises with entertaining features (20 minutes) | Postural re-education and oral health counseling.                                                     | N/A                                                 | N/A                              | None |
| Müller <i>et al</i> , BMC Medical Genetics 2008 [64] | An outpatient intervention program/ "Obeldicks"<br>(paediatricians, dietitians, psychologists and exercise physiologists)                                  | 1 year   | Optimised mixed diet<br><br>Fat and sugar reduced diet compared with the everyday nutrition of German children<br><br>Energy: 30% fat, 15% proteins, 55%                                          | Aerobic exercise, lifestyle exercise and decreasing sedentary behavior<br><br>Once weekly              | Contingency contracting, self-praise, monitoring, stimulus control and techniques and problem-solving | Questionnaire concerning eating and exercise habits | Participation in exercise groups | None |



|                                                        |                                                                                                                                                 |        |                                                                                                                                                                                                                                  |                                                                                                             |                                                                                                                   |                                                                 |                                        |                                                                                      |
|--------------------------------------------------------|-------------------------------------------------------------------------------------------------------------------------------------------------|--------|----------------------------------------------------------------------------------------------------------------------------------------------------------------------------------------------------------------------------------|-------------------------------------------------------------------------------------------------------------|-------------------------------------------------------------------------------------------------------------------|-----------------------------------------------------------------|----------------------------------------|--------------------------------------------------------------------------------------|
|                                                        |                                                                                                                                                 |        | carbohydrates including 5% sugar                                                                                                                                                                                                 |                                                                                                             |                                                                                                                   |                                                                 |                                        |                                                                                      |
| Reinehr <i>et al</i> ,<br>Diabetes, 2008<br>[65]       | Outpatient<br>intervention<br>program/"Obeldicks"<br><br>(paediatricians,<br>dietitians,<br>psychologists<br>and exercise<br>physiologists)     | 1 year | Optimised<br>mixed diet<br><br>Fat and sugar<br>reduced diet<br>compared<br>with the<br>everyday<br>nutrition of<br>German<br>children<br><br>Energy: 30%<br>fat, 15%<br>proteins, 55%<br>carbohydrates<br>including 5%<br>sugar | Aerobic<br>exercise,<br>lifestyle<br>exercise and<br>decreasing<br>sedentary<br>behavior<br><br>Once weekly | Contingency<br>contracting, self-<br>monitoring, praise,<br>stimulus control<br>techniques and<br>problem-solving | Questionnaire<br>concerning<br>eating and<br>exercise<br>habits | Participation<br>in exercise<br>groups | Motivation<br>phase: 26%<br><br>First 3<br>months of<br>the<br>Intervention<br>: 11% |
| Reinehr <i>et al</i> ,<br>Arch Dis Child,<br>2009 [66] | Outpatient<br>intervention<br>program/<br>"Obeldicks"<br><br>(paediatricians,<br>dietitians,<br>psychologists<br>and exercise<br>physiologists) | 1 year | Optimised<br>mixed diet<br><br>Fat and sugar<br>reduced diet<br>compared<br>with the<br>everyday<br>nutrition of<br>German<br>children<br><br>Energy: 30%<br>fat, 15%<br>proteins, 55%<br>carbohydrates                          | Aerobic<br>exercise,<br>lifestyle<br>exercise and<br>decreasing<br>sedentary<br>behavior<br><br>Once weekly | Contingency<br>contracting, self-<br>monitoring, praise,<br>stimulus control<br>techniques and<br>problem-solving | Questionnaire<br>concerning<br>eating and<br>exercise<br>habits | Participation<br>in exercise<br>groups | 14%                                                                                  |

|                                                  |                                                                                                                     |           |                                                                                                                                                                                                 |                                                                                           |                                                                                                   |                                                                                                  |                                  |                                                          |
|--------------------------------------------------|---------------------------------------------------------------------------------------------------------------------|-----------|-------------------------------------------------------------------------------------------------------------------------------------------------------------------------------------------------|-------------------------------------------------------------------------------------------|---------------------------------------------------------------------------------------------------|--------------------------------------------------------------------------------------------------|----------------------------------|----------------------------------------------------------|
|                                                  |                                                                                                                     |           | including 5% sugar                                                                                                                                                                              |                                                                                           |                                                                                                   |                                                                                                  |                                  |                                                          |
| Roth <i>et al</i> , BMC Pediatrics, 2013 [67]    | Outpatient intervention program/ "Obeldicks" (paediatricians, dietitians, psychologists and exercise physiologists) | 1 year    | Optimised mixed diet<br><br>Fat and sugar reduced diet compared with the everyday nutrition of German children<br><br>Energy: 30% fat, 15% proteins, 55% carbohydrates including 5% sugar       | Aerobic exercise, lifestyle exercise and decreasing sedentary behavior<br><br>Once weekly | Contingency contracting, self-monitoring, praise, stimulus control and problem-solving techniques | Questionnaire concerning eating and exercise habits                                              | Participation in exercise groups | None                                                     |
| Santoro <i>et al</i> , Am J Clin Nutr, 2007 [68] | Weight Reduction Program                                                                                            | 12 months | A nutritionally balanced diet<br><br>Energy: 50% carbohydrate, 30% fat, 20% protein<br><br>Self-selected diet of common foods: 60% of the recommended dietary energy allowances for age and sex | Physical exercise                                                                         | Individual psychological care of the child and his or her family                                  | Level of habitual physical activity, expressed as a score, based on a standardized questionnaire | N/A                              | 446/630 children dropped out (not included in the study) |

|                                                              |                                                                                                                                                                                 |                                           |                                                                                                                                                                                                                                                    |                                                                                                        |                                                                                                     |                                                     |                                  |      |
|--------------------------------------------------------------|---------------------------------------------------------------------------------------------------------------------------------------------------------------------------------|-------------------------------------------|----------------------------------------------------------------------------------------------------------------------------------------------------------------------------------------------------------------------------------------------------|--------------------------------------------------------------------------------------------------------|-----------------------------------------------------------------------------------------------------|-----------------------------------------------------|----------------------------------|------|
| Scherag <i>et al</i> , Obesity, 2011 [69]                    | Children: Outpatient lifestyle intervention program/"Obeldicks"<br><br>(paediatricians, dietitians, psychologists and exercise physiologists)<br><br>Adults: Hypoenergetic diet | Children : 1 year<br><br>Adults: 10 weeks | Children:<br>Optimised mixed diet<br><br>Fat and sugar reduced diet compared with the everyday nutrition of German children<br><br>Energy: 30% fat, 15% proteins, 55% carbohydrates including 5% sugar<br><br>Adults: Hypoenergetic diet (NUGENOB) | Children:<br>Aerobic exercise, lifestyle exercise and decreasing sedentary behavior<br><br>Once weekly | Children:<br>Contingency contracting, self-monitoring, praise, stimulus control and problem-solving | Questionnaire concerning eating and exercise habits | Participation in exercise groups | None |
| Schum <i>et al</i> , Exp Clin Endocrinol Diabetes, 2012 [70] | Lifestyle intervention program<br>(close surveillance by one physician)                                                                                                         | 6 months                                  | Optimized mixed diet                                                                                                                                                                                                                               | Increase from 1 to 2 hours per day, including all daily life activities and fitness training           | N/A                                                                                                 | N/A                                                 | N/A                              | N/A  |
| Vogel <i>et al</i> , Obes Facts, 2011 [71]                   | A lifestyle intervention program/"Obeldicks"                                                                                                                                    | 1 year                                    | Optimised mixed diet<br><br>Fat and sugar reduced diet compared                                                                                                                                                                                    | Aerobic exercise, lifestyle exercise and decreasing                                                    | Contingency contracting, self-monitoring, praise, stimulus control                                  | Questionnaire concerning eating and exercise habits | Participation in exercise groups | None |

|                                                                    |                                                                                                                      |         |                                                                                                                                                                                           |                                                                                           |                                                                                                   |                                                     |                                  |      |
|--------------------------------------------------------------------|----------------------------------------------------------------------------------------------------------------------|---------|-------------------------------------------------------------------------------------------------------------------------------------------------------------------------------------------|-------------------------------------------------------------------------------------------|---------------------------------------------------------------------------------------------------|-----------------------------------------------------|----------------------------------|------|
|                                                                    | (paediatricians, dietitians, psychologists and exercise physiologists)                                               |         | with the everyday nutrition of German children<br><br>Energy: 30% fat, 15% proteins, 55% carbohydrates including 5% sugar                                                                 | sedentary behavior<br><br>Once weekly                                                     | techniques and problem-solving                                                                    |                                                     |                                  |      |
| Volckmar <i>et al</i> ,<br>Exp Clin Endocrinol Diabetes, 2013 [72] | A lifestyle intervention program/ "Obeldicks" (paediatricians, dietitians, psychologists and exercise physiologists) | 1 year  | Optimised mixed diet<br><br>Fat and sugar reduced diet compared with the everyday nutrition of German children<br><br>Energy: 30% fat, 15% proteins, 55% carbohydrates including 5% sugar | Aerobic exercise, lifestyle exercise and decreasing sedentary behavior<br><br>Once weekly | Contingency contracting, self-monitoring, praise, stimulus control techniques and problem-solving | Questionnaire concerning eating and exercise habits | Participation in exercise groups | None |
| Zlatohlavek <i>et al</i> ,<br>Clinical Biochemistry, 2013 [73]     | Inpatient weight reduction program (dietician, exercise specialist)                                                  | 4 weeks | Dietary changes<br><br>A caloric intake of 5000 kJ for the age category of 8 to 10 years old and 7000 kJ for                                                                              | Five units (50 min each) of daily, supervised physical activity, totaling at least 120    | N/A                                                                                               | N/A                                                 | Participation in sessions        | 3.9% |

|                                                           |                                                                     |         |                                                                                                                                        |                                                                                                                                                                                                                                                 |     |     |                           |      |
|-----------------------------------------------------------|---------------------------------------------------------------------|---------|----------------------------------------------------------------------------------------------------------------------------------------|-------------------------------------------------------------------------------------------------------------------------------------------------------------------------------------------------------------------------------------------------|-----|-----|---------------------------|------|
|                                                           |                                                                     |         | those 11 to 15 years old.                                                                                                              | minutes of endurance training (heart rate of 65–75% of the maximum)<br><br>Aerobic and resistance training (ball games, swimming, dancing, fast walking)                                                                                        |     |     |                           |      |
| Zlatohlavek <i>et al</i> ,<br>Med Sci Monit,<br>2018 [74] | Inpatient weight reduction program (dietician, exercise specialist) | 4 weeks | Dietary changes<br><br>A caloric intake of 5000 kJ for the age category of 8 to 10 years old and 7000 kJ for those 11 to 15 years old. | Five units (50 min each) of daily, supervised physical activity, totaling at least 120 minutes of endurance training (heart rate of 65–75% of the maximum)<br><br>Aerobic and resistance training (ball games, swimming, dancing, fast walking) | N/A | N/A | Participation in sessions | None |

Abbreviations: N/A: not available

**Supplementary Material Table S2: Newcastle – Ottawa Quality Assessment Scale for Non-Randomized control studies - Cohort studies**

| References                                                            | Selection                            |                                                                        |                           |                                                       | Comparability                                      | Outcome               |                                                         |                       | Quality Score |
|-----------------------------------------------------------------------|--------------------------------------|------------------------------------------------------------------------|---------------------------|-------------------------------------------------------|----------------------------------------------------|-----------------------|---------------------------------------------------------|-----------------------|---------------|
|                                                                       | Representativeness of Exposed Cohort | Selection of the Non-Exposed Cohort from same source as exposed cohort | Ascertainment of Exposure | Outcome of Interest Was Not Present at Start of Study | Comparability of Cohorts (*Age/Sex,*Other Factors) | Assessment of Outcome | Follow-Up Long Enough for Outcome to Occur (*≥6 months) | Adequacy of Follow-Up |               |
| Barbian <i>et al</i> , J Pediatr Genet, 2019 [48]                     | *                                    | *                                                                      | *                         | *                                                     | **                                                 | *                     | *                                                       | *                     | Good          |
| Corgosinho <i>et al</i> , Neuropeptides, 2017 [49]                    | *                                    | *                                                                      | *                         | *                                                     | **                                                 | *                     | *                                                       | *                     | Good          |
| Deram <i>et al</i> , J Clin Endocrinol Metab, 2008 [50]               | *                                    | *                                                                      | *                         | *                                                     | **                                                 | *                     | -                                                       | *                     | Good          |
| do Nascimento <i>et al</i> , European Journal of Nutrition, 2017 [51] | *                                    | *                                                                      | *                         | *                                                     | *                                                  | *                     | -                                                       | *                     | Good          |
| Gajewska <i>et al</i> , Nutrients, 2016 [52]                          | *                                    | *                                                                      | *                         | *                                                     | **                                                 | *                     | -                                                       | *                     | Good          |
| Gao <i>et al</i> , Exp Physiol, 2015 [53]                             | *                                    | *                                                                      | *                         | *                                                     | *                                                  | *                     | -                                                       | *                     | Good          |
| Hagman <i>et al</i> , Pediatr Diabetes, 2018 [54]                     | *                                    | *                                                                      | *                         | *                                                     | **                                                 | *                     | *                                                       | *                     | Good          |
| Heitkamp <i>et al</i> , JAMA Pediatr,                                 | *                                    | *                                                                      | *                         | *                                                     | *                                                  | *                     | -                                                       | *                     | Good          |

|                                                                                |   |   |   |   |    |   |   |   |      |
|--------------------------------------------------------------------------------|---|---|---|---|----|---|---|---|------|
| 2020 [55]                                                                      |   |   |   |   |    |   |   |   |      |
| Hollensted <i>et al</i> ,<br>Obesity, 2018 [56]                                | * | * | * | * | ** | * | * | * | Good |
| Holzapfel <i>et al</i> ,<br>European Journal<br>of Endocrinology,<br>2011 [57] | * | * | * | * | *  | * | - | * | Good |
| Knoll <i>et al</i> , Horm<br>Metab Res 2012<br>[58]                            | * | * | * | * | ** | * | * | * | Good |
| Lai <i>et al</i> , Int. J. Biol.<br>Sci, 2013 [59]                             | * | * | * | * | ** | * | - | * | Good |
| Moleres <i>et al</i> , J<br>Pediatr, 2012 [61]                                 | * | * | * | * | *  | * | - | * | Good |
| Moleres <i>et al</i> ,<br>Nutricion<br>Hospitalaria, 2014<br>[62]              | * | * | * | * | *  | * | - | * | Good |
| Moraes <i>et al</i> , An<br>Acad Bras Cienc,<br>2016 [63]                      | * | * | * | * | *  | * | - | * | Good |
| Müller <i>et al</i> , BMC<br>Medical Genetics<br>2008 [64]                     | * | * | * | * | *  | * | * | - | Good |
| Reinehr <i>et al</i> ,<br>Diabetes, 2008 [65]                                  | * | * | * | * | *  | * | * | * | Good |
| Reinehr <i>et al</i> , Arch<br>Dis Child, 2009<br>[66]                         | * | * | * | * | ** | * | * | * | Good |
| Roth <i>et al</i> , BMC<br>Pediatrics, 2013<br>[67]                            | * | * | * | * | ** | * | * | * | Good |

|                                                                 |   |   |   |   |    |   |   |   |      |
|-----------------------------------------------------------------|---|---|---|---|----|---|---|---|------|
| Santoro <i>et al</i> , Am J Clin Nutr, 2007 [68]                | * | * | * | * | *  | * | * | * | Good |
| Scherag <i>et al</i> , Obesity, 2011 [69]                       | * | * | * | * | ** | * | * | * | Good |
| Schum <i>et al</i> , Exp Clin Endocrinol Diabetes, 2012 [70]    | * | * | * | * | ** | * | * | - | Good |
| Vogel <i>et al</i> , Obes Facts, 2011 [71]                      | * | * | * | * | ** | * | * | * | Good |
| Volckmar <i>et al</i> , Exp Clin Endocrinol Diabetes, 2013 [72] | * | * | * | * | ** | * | * | * | Good |
| Zlatohlavek <i>et al</i> , Clinical Biochemistry, 2013 [73]     | * | * | * | * | ** | * | - | * | Good |
| Zlatohlavek <i>et al</i> , Med Sci Monit, 2018 [74]             | * | * | * | * | ** | * | - | * | Good |

\*Asterisk: fulfillment of the criteria within the subsection, – Dash: the criteria within the subsection are not met. (A good quality score requires 3 or 4 stars in selection, 1 or 2 stars in comparability and 2 or 3 stars in outcome/exposure domain. When 2 stars are given in selection domain, 1 or 2 stars in comparability domain and 2 or 3 stars in outcome/exposure domain, fair quality is met. Finally, a poor-quality study is given 0 or 1 star in selection or 0 stars in comparability or 0 or 1 stars in outcome/exposure domain.)



**Supplementary Material Table S3:** Newcastle – Ottawa Quality Assessment Scale for Randomized controlled trials

| References                                      | Selection                |                                 |                       |                        | Comparability                                                              | Exposure               |                                                     |                   | Quality Score |
|-------------------------------------------------|--------------------------|---------------------------------|-----------------------|------------------------|----------------------------------------------------------------------------|------------------------|-----------------------------------------------------|-------------------|---------------|
|                                                 | Adequate case definition | Representativeness of the cases | Selection of Controls | Definition of Controls | Comparability of cases and controls on the basis of the design or analysis | Assessment of Exposure | Same method of ascertainment for cases and controls | Non-Response rate |               |
| Leite <i>et al</i> ,<br>Mortiz,<br>2017<br>[60] | *                        | *                               | -                     | *                      | *                                                                          | *                      | *                                                   | *                 | Good          |

\*Asterisk: fulfillment of the criteria within the subsection, – Dash: the criteria within the subsection are not met. (A good quality score requires 3 or 4 stars in selection, 1 or 2 stars in comparability and 2 or 3 stars in outcome/exposure domain. When 2 stars are given in selection domain, 1 or 2 stars in comparability domain and 2 or 3 stars in outcome/exposure domain, fair quality is met. Finally, a poor-quality study is given 0 or 1 star in selection or 0 stars in comparability or 0 or 1 stars in outcome/exposure domain.)

**Supplementary Table S4.** BMI and body composition outcomes in relation to the genotype.

| References                                                       | Genes        | SNPs or<br>Combination of<br>SNPs Examined | Risk/(Other)<br>Allele/<br>Allelic<br>combinations | Effect of Genotype after Intervention on:   |                                                 |                                                | Genetic<br>Inheritance<br>Model |
|------------------------------------------------------------------|--------------|--------------------------------------------|----------------------------------------------------|---------------------------------------------|-------------------------------------------------|------------------------------------------------|---------------------------------|
|                                                                  |              |                                            |                                                    | Weight Loss<br>(kg)                         | BMI (kg/m <sup>2</sup> ) /<br>BMI-SDS<br>Change | Body Composition<br>Change                     |                                 |
| Barbian <i>et al</i> , J<br>Pediatr Genet, 2020<br>[48]          | <i>FTO</i>   | rs9939609                                  | A (T)                                              | N/A                                         | -                                               | -                                              | Dominant                        |
| Corgosinho <i>et al</i> ,<br>Neuropeptides,<br>2017 [49]         | <i>LEPR</i>  | rs2767485                                  | C (T)                                              | N/A                                         | TT carriers<br>↑<br>P ≤ 0.05                    | -                                              | Dominant                        |
| Deram <i>et al</i> ,<br>J Clin Endocrinol<br>Metab,<br>2008 [50] | <i>PLIN1</i> | rs2289487                                  | C (T)                                              | Strong linkage disequilibrium with rs894160 |                                                 |                                                | Dominant                        |
|                                                                  |              | rs894160                                   | A (G)                                              | -                                           | -                                               | -                                              |                                 |
|                                                                  |              | rs2304795                                  | G (A)                                              | -                                           | -                                               | -                                              |                                 |
|                                                                  |              | rs1052700                                  | T (A)                                              | T allele<br>carriers<br>↑                   | T allele carriers<br>↑                          | Waist<br>circumference in T<br>allele carriers |                                 |

|                                                                             |             |                      |           |           |                                         |                                                                                              |          |
|-----------------------------------------------------------------------------|-------------|----------------------|-----------|-----------|-----------------------------------------|----------------------------------------------------------------------------------------------|----------|
|                                                                             |             |                      |           | P = 0.003 | P = 0.014                               | ↑<br>P = 0.05                                                                                |          |
| do Nascimento <i>et al</i> ,<br>European Journal of<br>Nutrition, 2017 [51] | <i>FTO</i>  | rs9939609            | A (T)     | N/A       | Children: -<br>Women: -                 | Children: -<br>Women:<br>Abdominal<br>circumference in A<br>allele carriers<br>↓<br>p = 0.04 | Dominant |
| Gajewska <i>et al</i> , 2016,<br>Nutrients [52]                             | <i>LEPR</i> | rs1137101<br>(Q223R) | G (A)     | N/A       | AG or GG<br>carriers:<br>↑<br>p = 0.035 | Delta Fat Mass (%)<br>in AG or GG<br>carriers<br>↑<br>p = 0.003                              | Dominant |
|                                                                             |             | rs8129183<br>(K656N) | C (G)     | N/A       | -                                       | -                                                                                            |          |
|                                                                             |             | Q223R + K656N        | Q223R: AA | N/A       | -                                       | Fat Mass (%):                                                                                |          |

|  |            |           |                                            |     |                    |                                               |  |
|--|------------|-----------|--------------------------------------------|-----|--------------------|-----------------------------------------------|--|
|  |            |           | AND<br>K656N: GG                           |     |                    | ↑<br><br>p < 0.001                            |  |
|  |            |           | Q223R: AG or<br>GG<br><br>AND<br>K656N: GG |     | ↑<br><br>p = 0.006 | Fat Mass (%):<br><br>↑<br><br>p < 0.001       |  |
|  |            |           | Q223R: AA<br><br>AND<br>K656N: GC or<br>CC |     | -                  | Fat-Free Mass (kg):<br><br>↑<br><br>p = 0.002 |  |
|  |            |           | Q223R: AG<br><br>AND<br>K656N: GC          |     | -                  | -                                             |  |
|  | LEP        | rs7799039 | A (G)                                      | N/A | -                  | -                                             |  |
|  | ADIPO<br>Q | rs266729  | G (C)                                      | N/A | -                  | -                                             |  |
|  |            | rs1686119 | G (A)                                      | N/A | -                  | -                                             |  |
|  |            |           |                                            |     |                    |                                               |  |

|                                                         |               |            |       |   |                                         |                                                |          |
|---------------------------------------------------------|---------------|------------|-------|---|-----------------------------------------|------------------------------------------------|----------|
| Gao <i>et al</i> , 2015, Exp<br>Physiol [53]            | <i>LPL</i>    | rs283      | A (G) | - | N/A                                     | Body Fat (%) in GG<br>carriers<br>↑<br>P=0.006 | Additive |
| Hagman <i>et al</i> ,<br>Pediatr Diabetes,<br>2018 [54] | <i>FTO</i>    | rs8050136  | A (C) | - | AA carriers vs<br>CC:<br>↑<br>P = 0.028 | -                                              | Additive |
| Heitkamp <i>et al</i> ,<br>JAMA Pediatr,<br>2020 [55]   | <i>TAL1</i>   | rs977747   | T (G) | - | -                                       | N/A                                            | Additive |
|                                                         | <i>ELAVL4</i> | rs11583200 | C (T) | - | -                                       |                                                |          |
|                                                         | <i>PTBP2</i>  | rs11165643 | T (C) | - | -                                       |                                                |          |
|                                                         | <i>GNAT2</i>  | rs17024393 | C (T) | - | -                                       |                                                |          |
|                                                         | <i>SEC16B</i> | rs543874   | G (A) | - | -                                       |                                                |          |
|                                                         | <i>ADCY3</i>  | rs10182181 | G (A) | - | -                                       |                                                |          |
|                                                         | <i>KCNK3</i>  | rs11126666 | A (G) | - | -                                       |                                                |          |

|  |                  |            |       |   |                                                           |  |  |
|--|------------------|------------|-------|---|-----------------------------------------------------------|--|--|
|  | <i>LRP1B</i>     | rs2121279  | T (C) | - | -                                                         |  |  |
|  | <i>FIGN</i>      | rs1460676  | C (T) | - | -                                                         |  |  |
|  | <i>UBE2E3</i>    | rs1528435  | T (C) | - | -                                                         |  |  |
|  | <i>CREB1</i>     | rs17203016 | G (A) | - | -                                                         |  |  |
|  | <i>LOC646736</i> | rs2176040  | A (G) | - | -                                                         |  |  |
|  | <i>RARB</i>      | rs6804842  | G (A) | - | -                                                         |  |  |
|  | <i>FHIT</i>      | rs2365389  | C (T) | - | -                                                         |  |  |
|  | <i>CADM2</i>     | rs13078960 | G (T) | - | Carriers of risk allele<br>↓<br>$P = 2.52 \times 10^{-5}$ |  |  |
|  | <i>ETV5</i>      | rs1516725  | C (T) | - | -                                                         |  |  |
|  | <i>GNPDA2</i>    | rs10938397 | G(A)  | - | -                                                         |  |  |

|  |                     |            |       |                                                                             |                                                                            |  |  |
|--|---------------------|------------|-------|-----------------------------------------------------------------------------|----------------------------------------------------------------------------|--|--|
|  | <i>SCARB</i><br>2   | rs17001654 | G (C) | -                                                                           | -                                                                          |  |  |
|  | <i>SLC39A</i><br>8  | rs13107325 | T (C) | -                                                                           | Carriers of risk<br>allele<br>↓<br>$P = 1.67 \times 10^{-4}$               |  |  |
|  | <i>HHIP</i>         | rs11727676 | T (C) | -                                                                           | -                                                                          |  |  |
|  | <i>C6orf10</i><br>6 | rs205262   | G (A) | -                                                                           | -                                                                          |  |  |
|  | <i>IFNGR1</i>       | rs13201877 | G (A) | Homozygous<br>carriers of<br>risk allele:<br>↑<br>$P = 2.39 \times 10^{-5}$ | Homozygous<br>carriers of risk<br>allele<br>↑<br>$P = 1.48 \times 10^{-4}$ |  |  |
|  | <i>PARK2</i>        | rs13191362 | A (G) | -                                                                           | -                                                                          |  |  |
|  | <i>HIP1</i>         | rs1167827  | G (A) | -                                                                           | -                                                                          |  |  |

|  |                     |            |       |                                                                                                 |   |  |  |
|--|---------------------|------------|-------|-------------------------------------------------------------------------------------------------|---|--|--|
|  | <i>HNF4G</i>        | rs17405819 | T (C) | -                                                                                               | - |  |  |
|  | <i>LINGO2</i>       | rs10968576 | G (A) | -                                                                                               | - |  |  |
|  | <i>EPB41L</i><br>4B | rs6477694  | C (T) | -                                                                                               | - |  |  |
|  | <i>TLR4</i>         | rs1928295  | T (C) | -                                                                                               | - |  |  |
|  | <i>LMX1B</i>        | rs10733682 | A (G) | <p>Homozygous carriers of risk allele:</p> <p>↑</p> <p><math>P = 6.37 \times 10^{-4}</math></p> | - |  |  |
|  | <i>GRID1</i>        | rs7899106  | G (A) | -                                                                                               | - |  |  |
|  | <i>HIF1AN</i>       | rs17094222 | C (T) | -                                                                                               | - |  |  |
|  | <i>TRIM66</i>       | rs4256980  | G (C) | -                                                                                               | - |  |  |
|  | <i>BDNF</i>         | rs11030104 | A (G) | -                                                                                               | - |  |  |
|  | <i>MTCH2</i>        | rs3817334  | T (C) | -                                                                                               | - |  |  |



|  |                                      |            |       |                                         |                                                                                     |  |  |
|--|--------------------------------------|------------|-------|-----------------------------------------|-------------------------------------------------------------------------------------|--|--|
|  | <i>CADM1</i>                         | rs12286929 | G (A) | -                                       | -                                                                                   |  |  |
|  | <i>CPNE8</i>                         | rs11170468 | A (C) | -                                       | <p>Carriers of risk allele</p> <p>↓</p> <p><math>P = 1.05 \times 10^{-4}</math></p> |  |  |
|  | <i>BCDIN3D</i>                       | rs7138803  | A (G) | -                                       | -                                                                                   |  |  |
|  | <i>ZNF664</i><br>-<br><i>FAM101A</i> | rs10773049 | C (T) | -                                       | -                                                                                   |  |  |
|  | <i>OLFM4</i>                         | rs12429545 | A (G) | -                                       | -                                                                                   |  |  |
|  | <i>MIR548A2</i>                      | rs1441264  | A (G) | -                                       | -                                                                                   |  |  |
|  | <i>LOC100287559</i>                  | rs7164727  | T (C) | Homozygous carriers of the risk allele: | -                                                                                   |  |  |

|  |               |            |       |                                        |                                                                   |  |  |
|--|---------------|------------|-------|----------------------------------------|-------------------------------------------------------------------|--|--|
|  |               |            |       | <div>↓</div> $P = 4.02 \times 10^{-4}$ |                                                                   |  |  |
|  | <i>NLRC3</i>  | rs758747   | T (C) | -                                      | -                                                                 |  |  |
|  | <i>GPRC5B</i> | rs12446632 | G (A) | -                                      | -                                                                 |  |  |
|  | <i>SBK1</i>   | rs2650492  | A (G) | -                                      | -                                                                 |  |  |
|  | <i>ATP2A1</i> | rs3888190  | A (C) | -                                      | -                                                                 |  |  |
|  | <i>INO80E</i> | rs4787491  | G (A) | -                                      | -                                                                 |  |  |
|  | <i>KAT8</i>   | rs9925964  | A (G) | -                                      | Carriers of risk allele<br><div>↑</div> $P = 3.84 \times 10^{-4}$ |  |  |
|  | <i>CBLN1</i>  | rs2080454  | C (A) | -                                      | -                                                                 |  |  |
|  | <i>RABEP1</i> | rs1000940  | G (A) | -                                      | -                                                                 |  |  |

|  |               |            |       |                                                                           |                                        |  |  |
|--|---------------|------------|-------|---------------------------------------------------------------------------|----------------------------------------|--|--|
|  | <i>RPTOR</i>  | rs12940622 | G (A) | Homozygous carriers of the risk allele:<br>↓<br>$P = 1.86 \times 10^{-5}$ | -                                      |  |  |
|  | <i>MC4R</i>   | rs6567160  | C (T) | -                                                                         | -                                      |  |  |
|  | <i>PGPEP1</i> | rs17724992 | A (G) | -                                                                         | -                                      |  |  |
|  | <i>KCTD15</i> | rs29941    | G (A) | -                                                                         | -                                      |  |  |
|  | <i>TOMM40</i> | rs2075650  | A (G) | -                                                                         | -                                      |  |  |
|  | <i>QPCTL</i>  | rs2287019  | C (T) | -                                                                         | -                                      |  |  |
|  | <i>ETS2</i>   | rs2836754  | C (T) | Homozygous carriers of the risk allele:                                   | Homozygous carriers of the risk allele |  |  |

|                                                 |                   |            |      |                                |                                |     |          |
|-------------------------------------------------|-------------------|------------|------|--------------------------------|--------------------------------|-----|----------|
|                                                 |                   |            |      | ↑<br>$P = 1.51 \times 10^{-4}$ | ↑<br>$P = 2.84 \times 10^{-4}$ |     |          |
| Hollensted <i>et al</i> ,<br>Obesity, 2018 [56] |                   | GRS        |      | N/A                            | -                              | N/A | Additive |
|                                                 | <i>GPR61</i>      | rs7550711  | T(C) |                                | -                              |     |          |
|                                                 | <i>SEC16B</i>     | rs543874   | G(A) |                                | -                              |     |          |
|                                                 | <i>GNPDA</i><br>2 | rs13130484 | T(C) |                                | -                              |     |          |
|                                                 | <i>TFAP2B</i>     | rs987237   | G(A) |                                | -                              |     |          |
|                                                 | <i>FAIM2</i>      | rs7132908  | A(G) |                                | -                              |     |          |
|                                                 | <i>OLFM4</i>      | rs12429545 | A(G) |                                | -                              |     |          |
|                                                 | <i>FTO</i>        | rs1421085  | C(T) |                                | -                              |     |          |
|                                                 | <i>LMX1B</i>      | rs3829849  | T(C) |                                | T allele carriers<br>↓         |     |          |

|                                                                                |                   |            |       |   |           |     |          |
|--------------------------------------------------------------------------------|-------------------|------------|-------|---|-----------|-----|----------|
|                                                                                |                   |            |       |   | P = 0.003 |     |          |
|                                                                                | <i>TMEM1</i><br>8 | rs4854349  | C(T)  |   | -         |     |          |
|                                                                                | <i>MC4R</i>       | rs6567160  | C(T)  |   | -         |     |          |
|                                                                                | <i>RAB27B</i>     | rs8092503  | G(A)  |   | -         |     |          |
|                                                                                | <i>ADCY3</i>      | rs11676272 | G(A)  |   | -         |     |          |
|                                                                                | <i>TNNI3K</i>     | rs12041852 | G(A)  |   | -         |     |          |
|                                                                                | <i>ELP3</i>       | rs13253111 | A(G)  |   | -         |     |          |
|                                                                                | <i>ADAM2</i><br>3 | rs13387838 | A(G)  |   | -         |     |          |
| Holzapfel <i>et al</i> ,<br>European Journal of<br>Endocrinology, 2011<br>[57] | <i>MTNR1</i><br>B | rs10830963 | G (C) | - | -         | -   | Additive |
| Knoll <i>et al</i> ,<br>Horm Metab Res<br>2012 [58]                            | <i>FAAH</i>       | rs324420   | A (C) | - | -         | N/A | Dominant |

|                                                 |                                                         |                         |       |     |                                                                                                            |                                                                                                                      |          |
|-------------------------------------------------|---------------------------------------------------------|-------------------------|-------|-----|------------------------------------------------------------------------------------------------------------|----------------------------------------------------------------------------------------------------------------------|----------|
| Lai <i>et al</i> , Int. J. Biol. Sci, 2013 [59] | <i>PBEF1</i><br>(Visfatin)                              | rs4730153               | A (G) | N/A | -                                                                                                          | -                                                                                                                    | N/A      |
| Leite <i>et al</i> , Mortiz, 2017 [60]          | $\beta 2$<br>adrenergic<br>receptor<br>( <i>ADRB2</i> ) | rs1042714<br>(Gln27Glu) | G (C) | -   | -                                                                                                          | -                                                                                                                    | Dominant |
| Moleres <i>et al</i> ,<br>J Pediatr, 2012 [61]  |                                                         | GRS                     |       | N/A | $\uparrow$<br>$P < 0.001$<br>(For each risk allele in the genotype, there was a 0.264 decrease in BMI-SDS) | $\uparrow$<br>$p=0.012$<br>(For each risk allele in the genotype, there was a 0.197 decrease in fat mass percentage) | Additive |
|                                                 | <i>FTO</i>                                              | rs9939609               | A (T) |     | Effect allele carriers                                                                                     | -                                                                                                                    |          |

|                                     |               |            |       |                        |                                          |                                          |     |
|-------------------------------------|---------------|------------|-------|------------------------|------------------------------------------|------------------------------------------|-----|
|                                     |               |            |       |                        | ↑<br>p = 0.018                           |                                          |     |
|                                     |               | rs7204609  | C (T) |                        | -                                        | -                                        |     |
|                                     | <i>MC4R</i>   | rs17782313 | C (T) |                        | -                                        | -                                        |     |
|                                     | <i>TMEM18</i> | rs7561317  | G (A) |                        | Effect allele carriers<br>↑<br>p = 0.005 | Effect allele carriers<br>↑<br>p = 0.038 |     |
|                                     | <i>IL6</i>    | rs1800795  | G (C) |                        | -                                        | -                                        |     |
|                                     | <i>PPARG</i>  | rs1801282  | G (C) |                        | -                                        | -                                        |     |
|                                     | <i>ADIPQ</i>  | rs822395   | C (A) |                        | -                                        | -                                        |     |
|                                     |               | rs2241766  | G (T) |                        | -                                        | -                                        |     |
|                                     |               | rs1501299  | T (G) |                        | -                                        | -                                        |     |
| Moleres <i>et al</i> ,<br>Nutricion | <i>APOA1</i>  | rs670      | A (G) | Effect allele carriers | Effect allele carriers                   | -                                        | N/A |

|                                                     |                               |                      |       |                                                         |                                                         |     |          |
|-----------------------------------------------------|-------------------------------|----------------------|-------|---------------------------------------------------------|---------------------------------------------------------|-----|----------|
| Hospitalaria, 2014<br>[62]                          |                               |                      |       | ↑<br>$P = 9.8 \times 10^{-5}$                           | ↑<br>$P < 0.001$                                        |     |          |
|                                                     | <i>APOA5</i>                  | rs662799             | C (T) | -                                                       | -                                                       |     |          |
|                                                     | <i>CETP</i>                   | rs1800777            | A (G) | Effect allele carriers<br>↑<br>$P = 1.5 \times 10^{-4}$ | Effect allele carriers<br>↑<br>$P = 0.01$               |     |          |
|                                                     | <i>FTO</i>                    | rs9939609            | A (T) | -                                                       | -                                                       |     |          |
|                                                     | <i>APOA1</i><br>+ <i>CETP</i> | rs670 +<br>rs1800777 | N/A   | Effect allele carriers<br>↑<br>$P = 3.3 \times 10^{-6}$ | Effect allele carriers<br>↑<br>$P = 2.3 \times 10^{-7}$ |     |          |
| Moraes <i>et al</i> , An Acad Bras Cienc, 2016 [63] | <i>FTO</i>                    | rs9939609            | A(T)  | -                                                       | -                                                       | -   | Dominant |
| Müller <i>et al</i> ,                               | <i>FTO</i>                    | rs9939609            | A(T)  | -                                                       | -                                                       | N/A | Additive |



|                                                  |                            |                       |                                    |     |                                 |     |                                   |
|--------------------------------------------------|----------------------------|-----------------------|------------------------------------|-----|---------------------------------|-----|-----------------------------------|
| BMC Medical Genetics, 2008 [64]                  |                            |                       |                                    |     |                                 |     |                                   |
| Reinehr <i>et al</i> , Diabetes, 2008 [65]       | <i>INSIG2</i>              | rs7566605             | C (G)                              | N/A | CC carriers:<br>↓<br>P = 0.007  | N/A | Recessive                         |
| Reinehr <i>et al</i> , Arch Dis Child, 2009 [66] | <i>INSIG2</i>              | rs7566605             | C (G)                              | N/A | CC carriers:<br>↓<br>p ≤ 0.001  | N/A | Additive                          |
|                                                  | <i>FTO</i>                 | rs9939609             | A (T)                              | N/A | -                               | N/A |                                   |
|                                                  | <i>INSIG2</i> + <i>FTO</i> | rs7566605 + rs9939609 | All possible genotype combinations | N/A | CC+AA carriers<br>↓<br>p ≤ 0.05 | N/A |                                   |
| Roth <i>et al</i> , BMC Pediatrics, 2013 [67]    | <i>DRD2</i>                | rs18000497            | T (C)                              | N/A | TT carriers:<br>↓<br>p < 0.05   | -   | Additive<br>Dominant<br>Recessive |

|                                                         |               |                                                |                            |     |                                           |     |          |
|---------------------------------------------------------|---------------|------------------------------------------------|----------------------------|-----|-------------------------------------------|-----|----------|
|                                                         | <i>DRD4</i>   | variable number<br>of tandem<br>repeats (VNTR) | 7 repeats<br>(longer: 7R+) | N/A | -                                         | -   |          |
| Santoro <i>et al</i> , Am J<br>Clin Nutr, 2007 [68]     | <i>MC3R</i>   | C17A (Thr6Lys;<br>rs3746619)                   | A (C)                      | N/A | Rare allele<br>carriers:<br>↓<br>p = 0.03 | N/A | N/A      |
|                                                         |               | G241A<br>(Val81Ile;<br>rs3827103)              | A (G)                      | N/A | Rare allele<br>carriers:<br>↓<br>p < 0.05 | N/A |          |
| Scherag <i>et al</i> ,<br><br>Obesity,<br><br>2011 [69] | <i>FTO</i>    | rs1558902                                      | A (T)                      | N/A | -                                         | N/A | Additive |
|                                                         |               | rs9935401                                      | A (G)                      |     | -                                         |     |          |
|                                                         | <i>MC4R</i>   | rs17700144                                     | A (G)                      |     | -                                         |     |          |
|                                                         | <i>TMEM18</i> | rs11127485                                     | C (T)                      |     | -                                         |     |          |

|  |                                                                       |            |       |  |                                                                         |  |  |
|--|-----------------------------------------------------------------------|------------|-------|--|-------------------------------------------------------------------------|--|--|
|  | TNKS-<br>MSRA                                                         | rs17150703 | A (G) |  | -                                                                       |  |  |
|  |                                                                       | rs13278851 | A (G) |  | -                                                                       |  |  |
|  |                                                                       | rs516175   | A (G) |  | -                                                                       |  |  |
|  | SDCCA<br>G8<br><br>(Examined<br>both in<br>children<br>and<br>adults) | rs10926984 | T (G) |  | Children TT<br>carriers:<br><br>↓<br><br>$P < 10^{-6}$<br><br>Adults: - |  |  |
|  |                                                                       | rs12145833 | T (G) |  | Children TT<br>carriers:<br><br>↓<br><br>$P < 10^{-6}$<br><br>Adults: - |  |  |
|  |                                                                       | rs2783963  | C (T) |  | Children CC<br>carriers:<br><br>↓                                       |  |  |

|                                                                    |     |                                                |                                                                                                                                                                                         |     |                      |     |     |
|--------------------------------------------------------------------|-----|------------------------------------------------|-----------------------------------------------------------------------------------------------------------------------------------------------------------------------------------------|-----|----------------------|-----|-----|
|                                                                    |     |                                                |                                                                                                                                                                                         |     | P < 10 <sup>-6</sup> |     |     |
|                                                                    |     |                                                |                                                                                                                                                                                         |     | Adults: -            |     |     |
| Schum <i>et al</i> , Exp<br>Clin Endocrinol<br>Diabetes, 2012 [70] | FTO | rs1421085                                      | C(T)                                                                                                                                                                                    | N/A | N/A                  | N/A | N/A |
|                                                                    |     | rs17817449                                     | G (T)                                                                                                                                                                                   |     |                      |     |     |
|                                                                    |     | rs9939609                                      | A (T)                                                                                                                                                                                   |     |                      |     |     |
|                                                                    |     | rs1421085<br>+<br>rs17817449<br>+<br>rs9939609 | Group 1:<br>heterozygotes:<br>for all 3 risk<br>alleles<br><br>Group 2:<br>homozygote for<br>at least one risk<br>allele<br><br>Group 3:<br>Homozygotes<br>for non-risk<br>alleles only | -   | -                    | -   |     |

|                                                                 |             |            |       |     |                                                                   |     |                                     |
|-----------------------------------------------------------------|-------------|------------|-------|-----|-------------------------------------------------------------------|-----|-------------------------------------|
| Vogel <i>et al</i> , Obes Facts, 2011 [71]                      | MC4R        | rs17782313 | C (T) | N/A | All subjects: -<br>Female risk allele carriers:<br>↑<br>p = 0.021 | N/A | Additive                            |
|                                                                 |             | rs12970134 | A (G) |     | All subjects: -<br>Female risk allele carriers:<br>↑<br>p = 0.009 |     |                                     |
| Volckmar <i>et al</i> , Exp Clin Endocrinol Diabetes, 2013 [72] | SH2B1       | rs7498665  | G (A) | N/A | -                                                                 | N/A | Additive,<br>Dominant,<br>Recessive |
|                                                                 | APOB4<br>8R | rs180743   | G (C) |     | -                                                                 |     |                                     |
| Zlatohlavek <i>et al</i> ,                                      | FTO         | rs17817449 | G (T) | -   | GG carriers compared to                                           | -   | N/A                                 |

|                                            |               |                            |                                                        |                                                                 |                                                                                          |                                                  |     |
|--------------------------------------------|---------------|----------------------------|--------------------------------------------------------|-----------------------------------------------------------------|------------------------------------------------------------------------------------------|--------------------------------------------------|-----|
| Clinical<br>Biochemistry,<br><br>2013 [73] |               |                            |                                                        |                                                                 | carriers of at least<br>one T allele<br><br>↑<br><br>P=0.05                              |                                                  |     |
|                                            | MC4R          | rs17782313                 | C (T)                                                  | -                                                               | CC carriers<br>compared<br>carriers of at least<br>one T allele<br><br>↑<br><br>P = 0.03 | Total fat:<br>CC carriers<br><br>↑<br><br>P=0.03 |     |
|                                            | FTO +<br>MC4R | rs17817449 +<br>rs17782313 | All possible<br>allele<br>combinations<br><br>examined | FTO GG<br>and/or<br>MCR4 CC<br>carriers:<br><br>↑<br><br>P=0.01 | FTO GG and/or<br>MCR4 CC<br>carriers:<br><br>↑<br><br>P = 0.01                           | -                                                |     |
| Zlatohlavek <i>et al</i> ,                 | TMEM-<br>18   | rs4854344                  | T (G)                                                  | -                                                               | -                                                                                        | -                                                | N/A |

|                             |                      |           |       |   |   |   |  |
|-----------------------------|----------------------|-----------|-------|---|---|---|--|
| Med Sci Monit, 2018<br>[74] |                      |           |       |   |   |   |  |
|                             | <i>NYD-<br/>SP18</i> | rs6971091 | A (G) | - | - | - |  |

Abbreviations: N/A: not available, -: not statistically significant, ↑ : greater reduction, ↓ : lesser reduction, GRS: genetic risk score.
